# Supplementary material for: A manganese(iii) Schiff base complex immobilized on silica-coated magnetic nanoparticles showing enhanced electrochemical catalytic performance toward sulfide and alkene oxidation
Source: Royal Society of Chemistry journal article supplement (doi:10.1039/d0ra02728f), 2020-01-01
Supplement: d0ra02728f1.pdf [file d0ra02728f1.pdf]

## Single-crystalline Mn(III) Schiff base complex immobilized on silica-coated magnetic nanoparticles delivering enhanced electrochemical catalytic performance toward sulfide and alkene oxidation

Saeed Rayati<sup>1,\*</sup>, Elham Khodaei<sup>1</sup>, Parinaz Nafarieh<sup>1</sup>, Majid Jafarian<sup>1</sup>, Bahareh Elmi<sup>1</sup> Andrzej, Wojtczak<sup>2</sup>

<sup>1</sup> Department of Chemistry, K.N. Toosi University of Technology, P.O. Box 16315-1618, Tehran 15418, Iran

<sup>2</sup> Faculty of Chemistry, N. Copernicus University, Gagarina 7, 87-100 Torun, Poland

S1

Characterization section

Table S1. Selected bond lengths [Å] and angles [°] for MnL(OAc).

| Bond distances |            | Bond angles |           |
|----------------|------------|-------------|-----------|
| Mn1-O1         | 1.8630(14) | O1-Mn1-O2   | 91.36(7)  |
| Mn1-O2         | 1.9251(15) | O1-Mn1-N2   | 178.81(7) |
| Mn1-N2         | 1.9925(16) | O2-Mn1-N2   | 87.67(7)  |
| Mn1-O5         | 2.1188(16) | O1-Mn1-O5   | 92.39(6)  |
| Mn1-N1         | 2.1289(17) | O2-Mn1-O5   | 159.56(6) |
| Mn1-O6         | 2.2870(16) | N2-Mn1-O5   | 88.76(6)  |
| Mn1-C22        | 2.547(2)   | O1-Mn1-N1   | 88.79(6)  |
| O1-C1          | 1.318(2)   | O2-Mn1-N1   | 108.61(7) |
| C1-C6          | 1.411(3)   | N2-Mn1-N1   | 90.86(6)  |
| C1-C2          | 1.422(3)   | O5-Mn1-N1   | 91.56(6)  |
| C2-O3          | 1.361(3)   | O1-Mn1-O6   | 90.02(6)  |
| C2-C3          | 1.369(3)   | O2-Mn1-O6   | 100.55(6) |
| C3-C4          | 1.390(3)   | N2-Mn1-O6   | 90.84(6)  |
| C4-C5          | 1.371(3)   | O5-Mn1-O6   | 59.37(6)  |
| C5-C6          | 1.400(3)   | N1-Mn1-O6   | 150.84(6) |
| C6-C7          | 1.449(3)   | O1-Mn1-C22  | 90.74(7)  |
| C7-N1          | 1.274(3)   | O2-Mn1-C22  | 130.00(7) |
| N1-C8          | 1.470(2)   | N2-Mn1-C22  | 90.42(7)  |
| C8-C9          | 1.532(3)   | O5-Mn1-C22  | 29.90(6)  |
| C9-C19         | 1.527(3)   | N1-Mn1-C22  | 121.38(7) |
| C9-C20         | 1.537(3)   | O6-Mn1-C22  | 29.49(6)  |

|         |          |             |            |
|---------|----------|-------------|------------|
| C9-C10  | 1.538(3) | C1-O1-Mn1   | 123.49(12) |
| C10-N2  | 1.473(3) | O1-C1-C6    | 123.54(18) |
| N2-C11  | 1.293(3) | O1-C1-C2    | 117.95(18) |
| C11-C12 | 1.445(3) | C6-C1-C2    | 118.35(18) |
| C12-C13 | 1.411(3) | O3-C2-C3    | 125.1(2)   |
| C12-C17 | 1.417(3) | O3-C2-C1    | 114.59(18) |
| C13-C14 | 1.375(4) | C3-C2-C1    | 120.3(2)   |
| C14-C15 | 1.384(4) | C2-C3-C4    | 120.9(2)   |
| C15-C16 | 1.375(3) | C5-C4-C3    | 119.9(2)   |
| C16-O4  | 1.371(3) | C4-C5-C6    | 120.9(2)   |
| C16-C17 | 1.420(3) | C5-C6-C1    | 119.54(19) |
| C17-O2  | 1.320(3) | C5-C6-C7    | 118.09(19) |
| O3-C18  | 1.419(3) | C1-C6-C7    | 122.16(18) |
| O4-C21  | 1.413(3) | N1-C7-C6    | 125.98(19) |
| O5-C22  | 1.273(3) | C7-N1-C8    | 118.12(17) |
| O6-C22  | 1.256(3) | C7-N1-Mn1   | 120.31(14) |
| C22-C23 | 1.490(3) | C8-N1-Mn1   | 121.47(13) |
|         |          | N1-C8-C9    | 114.57(16) |
|         |          | C19-C9-C8   | 110.84(17) |
|         |          | C19-C9-C20  | 110.98(18) |
|         |          | C8-C9-C20   | 107.04(17) |
|         |          | C19-C9-C10  | 110.64(18) |
|         |          | C8-C9-C10   | 111.26(17) |
|         |          | C20-C9-C10  | 105.92(17) |
|         |          | N2-C10-C9   | 113.35(16) |
|         |          | C11-N2-C10  | 118.96(17) |
|         |          | C11-N2-Mn1  | 122.67(14) |
|         |          | C10-N2-Mn1  | 118.37(13) |
|         |          | N2-C11-C12  | 125.77(19) |
|         |          | C13-C12-C17 | 120.1(2)   |
|         |          | C13-C12-C11 | 119.0(2)   |
|         |          | C17-C12-C11 | 120.44(19) |
|         |          | C14-C13-C12 | 120.7(2)   |
|         |          | C13-C14-C15 | 119.5(2)   |
|         |          | C16-C15-C14 | 121.6(2)   |

|  |  |              |            |
|--|--|--------------|------------|
|  |  | C16-C15-H15A | 119.2      |
|  |  | O4-C16-C15   | 118.1(2)   |
|  |  | O4-C16-C17   | 121.1(2)   |
|  |  | C15-C16-C17  | 120.7(2)   |
|  |  | O2-C17-C12   | 122.51(19) |
|  |  | O2-C17-C16   | 120.02(19) |
|  |  | C12-C17-C16  | 117.41(19) |
|  |  | C17-O2-Mn1   | 123.62(13) |
|  |  | C2-O3-C18    | 117.47(19) |
|  |  | C16-O4-C21   | 116.97(18) |
|  |  | C22-O5-Mn1   | 94.03(14)  |
|  |  | C22-O6-Mn1   | 86.82(13)  |
|  |  | O6-C22-O5    | 119.7(2)   |
|  |  | O6-C22-C23   | 121.6(2)   |
|  |  | O5-C22-C23   | 118.7(2)   |
|  |  | O6-C22-Mn1   | 63.69(12)  |
|  |  | O5-C22-Mn1   | 56.07(11)  |
|  |  | C23-C22-Mn1  | 174.29(18) |

---

Symmetry transformations used to generate equivalent atoms:

angles [°] for MnL(OAc).

---

|                       |             |
|-----------------------|-------------|
| O(2)-Mn(1)-O(1)-C(1)  | 65.41(16)   |
| O(5)-Mn(1)-O(1)-C(1)  | -134.69(15) |
| N(1)-Mn(1)-O(1)-C(1)  | -43.17(15)  |
| O(6)-Mn(1)-O(1)-C(1)  | 165.97(15)  |
| C(22)-Mn(1)-O(1)-C(1) | -164.55(16) |
| Mn(1)-O(1)-C(1)-C(6)  | 38.2(3)     |
| Mn(1)-O(1)-C(1)-C(2)  | -146.50(15) |
| O(1)-C(1)-C(2)-O(3)   | 3.3(3)      |
| C(6)-C(1)-C(2)-O(3)   | 178.86(18)  |
| O(1)-C(1)-C(2)-C(3)   | -176.5(2)   |
| C(6)-C(1)-C(2)-C(3)   | -0.9(3)     |
| O(3)-C(2)-C(3)-C(4)   | -177.1(2)   |
| C(1)-C(2)-C(3)-C(4)   | 2.6(4)      |
| C(2)-C(3)-C(4)-C(5)   | -1.4(4)     |
| C(3)-C(4)-C(5)-C(6)   | -1.5(4)     |
| C(4)-C(5)-C(6)-C(1)   | 3.2(3)      |
| C(4)-C(5)-C(6)-C(7)   | 178.0(2)    |
| O(1)-C(1)-C(6)-C(5)   | 173.39(19)  |
| C(2)-C(1)-C(6)-C(5)   | -1.9(3)     |
| O(1)-C(1)-C(6)-C(7)   | -1.2(3)     |
| C(2)-C(1)-C(6)-C(7)   | -176.55(19) |
| C(5)-C(6)-C(7)-N(1)   | 170.1(2)    |
| C(1)-C(6)-C(7)-N(1)   | -15.2(3)    |
| C(6)-C(7)-N(1)-C(8)   | 172.47(19)  |
| C(6)-C(7)-N(1)-Mn(1)  | -4.0(3)     |
| C(7)-N(1)-C(8)-C(9)   | 136.83(19)  |
| Mn(1)-N(1)-C(8)-C(9)  | -46.7(2)    |
| N(1)-C(8)-C(9)-C(19)  | -61.6(2)    |
| N(1)-C(8)-C(9)-C(20)  | 177.22(18)  |
| N(1)-C(8)-C(9)-C(10)  | 61.9(2)     |
| C(19)-C(9)-C(10)-N(2) | 51.7(2)     |
| C(8)-C(9)-C(10)-N(2)  | -72.0(2)    |
| C(20)-C(9)-C(10)-N(2) | 172.00(18)  |
| C(9)-C(10)-N(2)-C(11) | -115.9(2)   |

|                         |             |
|-------------------------|-------------|
| C(9)-C(10)-N(2)-Mn(1)   | 64.7(2)     |
| C(10)-N(2)-C(11)-C(12)  | 169.89(19)  |
| Mn(1)-N(2)-C(11)-C(12)  | -10.8(3)    |
| N(2)-C(11)-C(12)-C(13)  | 170.7(2)    |
| N(2)-C(11)-C(12)-C(17)  | -16.6(3)    |
| C(17)-C(12)-C(13)-C(14) | 1.0(3)      |
| C(11)-C(12)-C(13)-C(14) | 173.7(2)    |
| C(12)-C(13)-C(14)-C(15) | -2.2(4)     |
| C(13)-C(14)-C(15)-C(16) | 0.9(4)      |
| C(14)-C(15)-C(16)-O(4)  | -173.8(2)   |
| C(14)-C(15)-C(16)-C(17) | 1.6(3)      |
| C(13)-C(12)-C(17)-O(2)  | 178.6(2)    |
| C(11)-C(12)-C(17)-O(2)  | 6.0(3)      |
| C(13)-C(12)-C(17)-C(16) | 1.4(3)      |
| C(11)-C(12)-C(17)-C(16) | -171.17(19) |
| O(4)-C(16)-C(17)-O(2)   | -4.8(3)     |
| C(15)-C(16)-C(17)-O(2)  | -180.0(2)   |
| O(4)-C(16)-C(17)-C(12)  | 172.5(2)    |
| C(15)-C(16)-C(17)-C(12) | -2.7(3)     |
| C(12)-C(17)-O(2)-Mn(1)  | 31.7(3)     |
| C(16)-C(17)-O(2)-Mn(1)  | -151.18(15) |
| C(3)-C(2)-O(3)-C(18)    | 4.2(4)      |
| C(1)-C(2)-O(3)-C(18)    | -175.6(3)   |
| C(15)-C(16)-O(4)-C(21)  | -119.9(3)   |
| C(17)-C(16)-O(4)-C(21)  | 64.7(3)     |
| Mn(1)-O(6)-C(22)-O(5)   | 2.1(2)      |
| Mn(1)-O(6)-C(22)-C(23)  | -177.5(2)   |
| Mn(1)-O(5)-C(22)-O(6)   | -2.3(2)     |
| Mn(1)-O(5)-C(22)-C(23)  | 177.3(2)    |

---

Symmetry transformations used to generate equivalent atoms:

**Table S2. Hydrogen bonds for MnL(OAc) [Å and °].**

| D-H...A               | d(D-H) | d(H...A) | d(D...A) | <(DHA) |
|-----------------------|--------|----------|----------|--------|
| C(7)-H(7A)...O(5)#1   | 0.93   | 2.56     | 3.201(2) | 126.4  |
| C(10)-H(10A)...O(5)   | 0.97   | 2.58     | 3.138(3) | 116.7  |
| C(18)-H(18A)...O(6)#2 | 0.96   | 2.56     | 3.512(3) | 171.8  |
| C(21)-H(21B)...O(2)   | 0.96   | 2.37     | 2.983(3) | 121.7  |

Symmetry transformations used to generate equivalent atoms:

#1 -x+1,-y,-z+1    #2 -x+1,y+1/2,-z+1/2

S2

### *Result and discussion section*

The reaction proposed pathway is shown in Scheme 1. The reduction reaction of H<sub>2</sub>O<sub>2</sub> in the presence of electrode depends on the solution conditions. In an acid solution, H<sub>2</sub>O<sub>2</sub> is decomposed into H<sub>2</sub>O and O<sub>2</sub> [1]. On the other hand, in neutral or alkaline solutions OH<sup>-</sup> anions are produced [2,3]. Because the reaction mixture used in this experiment was maintained to be neutral, it is concluded that H<sub>2</sub>O<sub>2</sub> was decomposed into OH<sup>-</sup> ions by the reduction reaction (1) on the surface of glassy carbon electrode. The pH near the electrode surface may shift to be alkaline because of generation of OH<sup>-</sup> ions and in this case, production of OH radicals in acidic or alkaline solutions has been reported [4].

Provided that OH radicals are generated, they can react with H<sub>2</sub>O<sub>2</sub> to produce dioxidanyl radical (OOH radical) which can involve with the catalyst as follows [5]. The dioxidanyl radical could bind to the metal center of Fe<sub>3</sub>O<sub>4</sub>@SiO<sub>2</sub>-[Mn<sup>III</sup>L(OAc)] and cause one-electron electrochemical reduction of the Mn(III) complex, followed by the transfer of a second electron to form Fe<sub>3</sub>O<sub>4</sub>@SiO<sub>2</sub>-[Mn<sup>II</sup>(OOH)L(OAc)] adduct (3). Afterwards, as in previous reports, heterolytic cleavage of the O-O bond in the hydroperoxo intermediate, here seems to be activated by the potential of electrode, produces the oxo-species [Mn(V)Schiff base = O] (4) [5]. This high valent metal oxo species is highly activated, resulting the oxygen transfer to the desired substrates (sulfides of alkenes) [6,7].

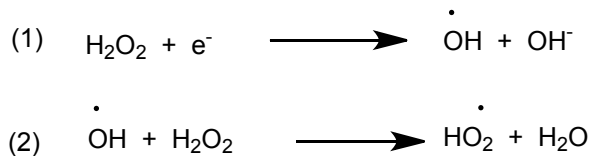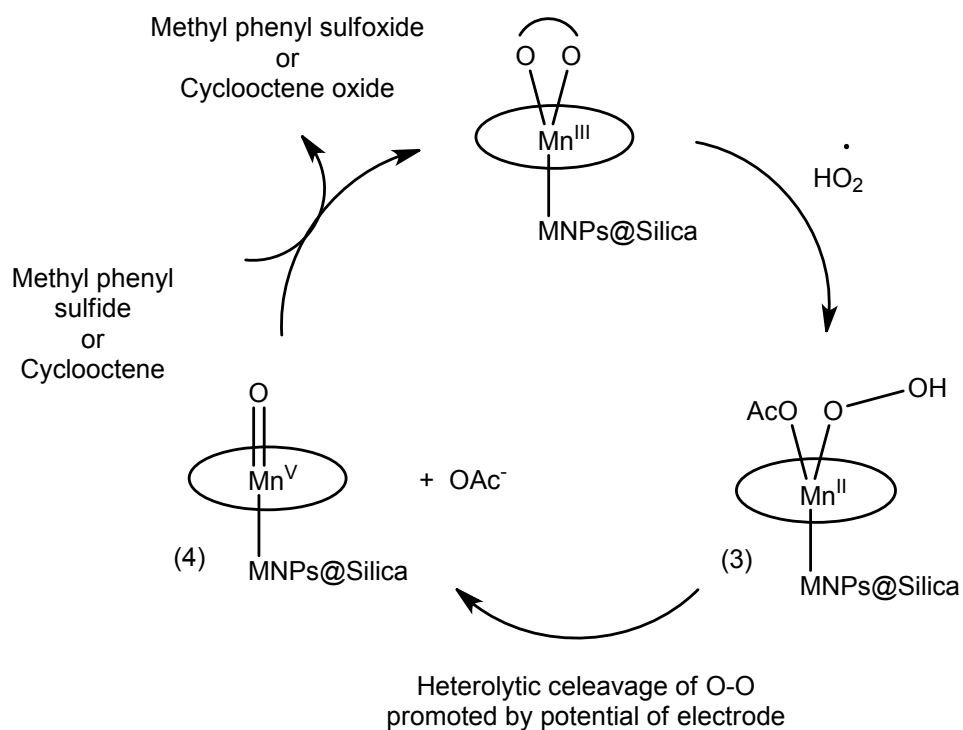

**Scheme S1.** Plausible mechanism for the electrochemical oxidation of sulfides and alkenes catalyzed by  $\text{Fe}_3\text{O}_4@\text{SiO}_2\text{-}[\text{MnL}(\text{OAc})]$  in the presence of glassy carbon electrode.

- [1] A.D. Onu, J.F. Iyun, and O.S. Idris, *Open J. Inorg. Chem.* 2015, **5**, 75-82.
- [2] A.A. Karyakin, and E.E. Karyakina, Gorton, L. *Electrochem. Commun.* **1999**, 1, 78-82.
- [3] L.F. Oldfield, *Trans. Faraday Soc.* 1955, **51**, 249–259.
- [4] Q. Yue, K. Zhang, X. Chen, L. Wang, J. Zhao, J. Liu, and J. Jia, *Chem. Commun.* **2010**, 46, 3369-3371.
- [5] R. Egekenze, Y. Gultneh, and R. Butcher, *Polyhedron*, 2018, 144, 198-209.
- [6] a) H. B. Ji, X. T. Zhou, *Biomimetic Epoxidation of Olefins Catalyzed by Metalloporphyrins with Molecular Oxygen*, INTECH Open Access Publisher, London, UK, 2011. b) G. Huang, S. Y. Liu, Y. A. Guo, A. P. Wang, and J. Luo, C. C. Cai, *Appl. Catal. A*, 2009, **358**, 173-179.

[7] W. Yan, J. Wang, J Ding, P. Sun, S. Zhang, J. Shenb and Xin Jin, *Dalton Trans.*, 2019, **48**, 16827-16843.
